# Supplementary material for: Normal and pathological erythropoiesis in adults: from gene regulation to targeted treatment concepts
Source: PubMed Central journal article supplement — Haematologica. 2018 Aug 3;103(10):1593–603. doi: 10.3324/haematol.2018.192518 (PMC6165792; doi:10.3324/haematol.2018.192518), 2018-10

# Major pathways and molecules involved in the regulation of erythropoiesis

## Development of erythropoietic progenitor cells and erythroblasts

## Caspase activation during terminal erythroid differentiation

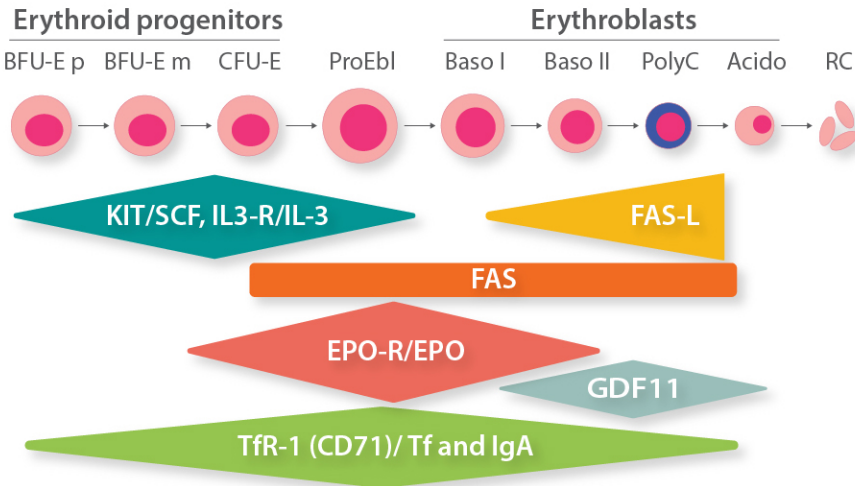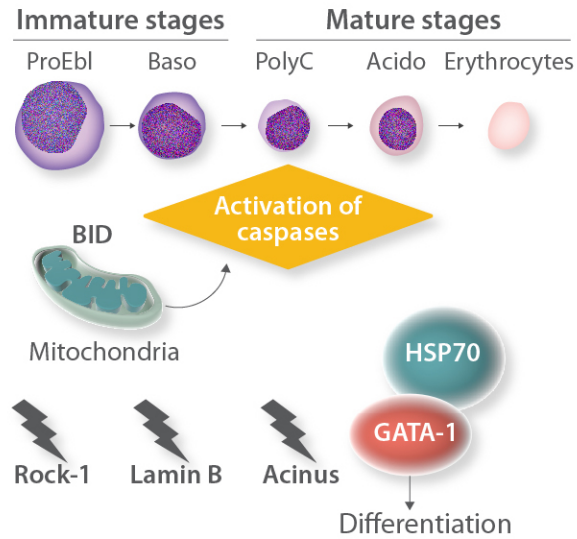

## Model of terminal erythroid differentiation and apoptosis regulated by the nuclear localization of HSP70

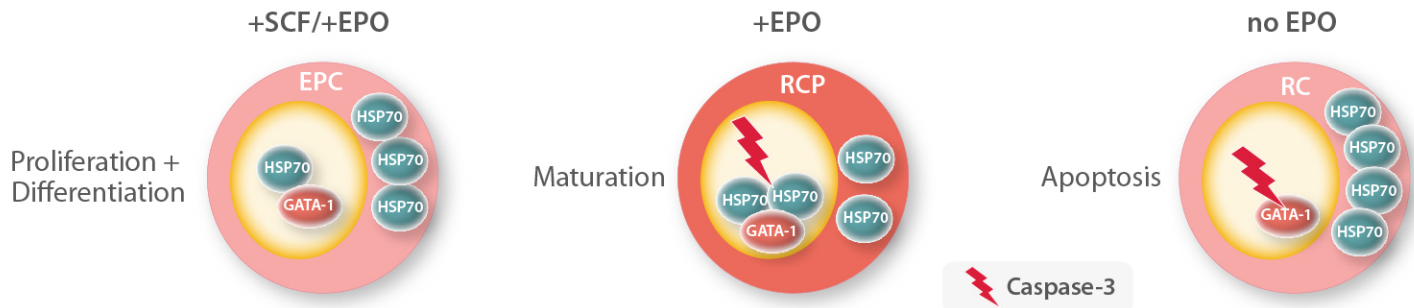

Supplement: HAEMATOL-2018-192518v3-Valent-01.pdf [file HAEMATOL-2018-192518v3-Valent-01.pdf]
